# Supplementary material
Source: ML conference proceedings conference paper supplement (https://openreview.net/forum?id=Tjp51oUrk3)
Supplement: supplementary_material [file attachment]

# ICLR2023 RESPONSE TO REVIEWER SHEET

## Anonymous authors

Paper under double-blind review

Based on the suggestions from reviewers in the first discussion stage, we have modified the manuscript and the changes are highlighted with a purple colour in the revised manuscript. The revised manuscript with highlighted changes and without any highlights is also uploaded in the supplementary materials. A summary of responses to comments from three reviewers is given below,

## 1 REVIEWER 1: REVIEWER U6V5

We thank reviewer for their valuable suggestions and comments. We appreciate that the reviewer finds the paper easy to read. We have addressed the comments asked by the reviewer as given below,

**Comment 1:** The novelty of this paper is limited. This paper is based on the norm of channels, and there have been many similar novel papers in recent years.

**Response:** The proposed pruning method uses operator norm of the filter and implicitly considers how a filter transforms a given input to output. This is in contrast to the existing norm-based pruning method which uses entry-wise norm such as absolute sum of the weights (Li et al. (2017)) of the filters. Utilizing operator norm of the filter, our experiments (Please see revised manuscript: Figure 7, Figure 10 (Appendix), Figure 15 (Appendix)) across various CNNs designed for audio and image classification reveal that considering operator norm in pruning result in similar or better performance compared to that of the entry-wise norm methods at different pruning ratio. Since, the proposed pruning method generalizes better across different domains and hence is useful compared to the existing entry-wise norm methods.

**Comment 2:** The authors should give experiments with ImageNet dataset

**Response:** Given the time to update the manuscript and the resources for running experiments on ImageNet dataset during this phase of rebuttal period, we are able to include experiments on VGG-16 network and a pre-trained ResNet-50 network on ImageNet for CIFAR-10 dataset in the revised manuscript (Appendix). Also, we have updated the code repository (online link is in the revised manuscript) covering the experiments for VGG-16 network and ResNet-50 network on CIFAR-10. In future, we would like to perform experiments with ImageNet dataset and report the result by the camera-ready submission.

## 2 REVIEWER 2: REVIEWER QJDR

We thank reviewer for their valuable suggestions and comments. We appreciate that the reviewer finds the paper easy to understand. Based on the suggestions from the reviewer, we have performed more experimental analysis and addressed the comments as given below,

**Comment 1:** The experimental validation is very weak. For visual classification, the authors performed VGG-on-MNIST experiments solely, which cannot fully support the superiority and applicability of the proposed method. In contrast, recent works (e.g., Molchanov [2019], Lin [2020], Sui [2021]) always include the experiments with ResNets on ImageNet as well as CIFAR to show the merits of their methods. I would highly recommend the authors to add empirical support on ImageNet and CIFAR with various architectures including ResNets. In particular, how can the proposed method be applied/extended for residual blocks?

**Response:** Reviewer U6V5 also suggested to perform experiments on ImageNet. Given the time to update the manuscript and the resources for running experiments on ImageNet dataset during this phase of rebuttal period, we are able to include experiments on VGG-16 network and a pre-trained ResNet-50 network on ImageNet for CIFAR-10 dataset in the revised manuscript (Appendix). We

have updated the code repository (online link is in the revised manuscript) covering the experiments for VGG-16 network and ResNet-50 network on CIFAR-10. In future, we would like to perform experiments with ImageNet dataset and report the result by the camera-ready submission.

In performing pruning across ResNet-50 architecture shown in Figure 12 in the revised manuscript (Appendix), we consider convolutional layers having  $(3 \times 3)$  filters for pruning since they contain more parameters and computations compared to that of the convolutional layers with  $(1 \times 1)$  filters. The proposed pruning method can be applied directly to the convolutional layers in the residual branch as well. For this, the same number of filters from the convolutional layer in the residual branch should be pruned as that of the convolutional layer from the main “branch c” as shown in Figure 12c in the revised manuscript (Appendix). This is to ensure the same dimensionality while performing addition operation between the main branch output  $F(x)$  and the residual branch output  $G(x)$ . After applying the proposed pruning method on ResNet-50, the number of MACs are reduced by 30%, the number of parameters are reduced by 33% at marginal drop in accuracy of 0.29 percentage points compared to the unpruned ResNet-50, as given in Table 4 (Appendix).

**Comment 2:** Furthermore, the baselines seem very weak: only the comparison to L1-norm and geometric median pruning (which are classical methods nowadays) was conducted. It would be helpful to include additional recent baselines (e.g., L1 Slimming (Liu et al., 2017), Polarization Regularization (Zhuang et al., 2020), Deep Hoyer (Yang et al., 2019)) to demonstrate the superiority of this work.

**Response:** The proposed pruning method focuses on pruning filters in a passive manner, where only filters are used to identify set of filters required to retain or prune without involving any dataset. In contrast to the active filter pruning methods, the advantage of the proposed passive pruning method is that there is no need to produce feature maps and perform optimization process while identifying pruned set of filters, which is time-consuming and require more memory resources. Commonly used active filter pruning methods such as HRank (Lin et al. (2020)) and Energy-aware pruning (Yeom et al. (2021)) use feature maps to identify pruned set of filters, L1-slimming (Liu et al. (2017)) and GAL-0.1 (Lin et al. (2019)) use an optimization process to regularize soft mask associated with each feature maps during training process to identify pruned set of filters. In particular, when there is already an existing pre-trained network, identifying pruned set of filters using optimization process (Lin et al. (2019); Liu et al. (2017)) would be heavily computationally expensive compared to that of the proposed pruning method. Therefore, the proposed work mainly focused on passive filter pruning method.

To analyse the performance of the active and passive filter pruning methods, we include Table 3 in the revised manuscript (Appendix). In general, we find that pruning filters using the proposed pruning method result in a similar reduction of parameters with a drop in accuracy of approximately 1 percentage points compared to the methods that involve dataset to prune filters by using feature maps (Lin et al. (2020); Yeom et al. (2021)), regularisation techniques during training (Liu et al. (2017)) or knowledge distillation (Lin et al. (2019)). Therefore, the proposed pruning method is advantageous owing to identifying pruned filters without using any dataset, and the pruned network can still achieves accuracy close to that of the active filter pruning methods. In future, we would like to improve the performance of the proposed framework by improving fine-tuning strategy.

**Comment 3:** I was not able to identify a clear superiority of the proposed method over the baselines, especially in the VGG-MNIST experiments. In addition, in the DCASE21-DCASE-20 case in Figure 7(b), the results of the operator norm method and those of the GM-based one look very similar at the pruning ratio of 25% and 50%; I think the performance drop at the large pruning ratio (75%, 90%) may be unacceptable and thus the comparison at these ratios may be useless.

**Response:** We find that the proposed pruning method gives similar performance at smaller pruning ratios and improves performance at high pruning ratio for CNNs designed for audio classification application as shown in Figure 7 in the revised manuscript. In general, the proposed pruning method gives similar or better accuracy at various pruning ratio compared to that of the existing entry-wise norm methods across different CNNs designed for audio and image classification (Figure 7, Figure 10 (Appendix) and Figure 15 (Appendix) in the revised manuscript), hence showing the generalization ability across different domains as well. Therefore, the proposed pruning framework is advantageous over the existing entry-wise norm methods.

We agree that the accuracy drop increases as the pruning ratio increases. However, the choice of selecting high pruning ratio may be useful to obtain smaller size CNNs from the large-size CNNs for their deployment on resource-constrained devices having limited computational resources. For example, Cortex-M4 devices (e.g. STM32L496@80MHz or Arduino Nano 33@64MHz) have an upper limit of only 128K on total number of parameters and a maximum limit of only 30M for multiply-accumulate operations (MACs) (Martín-Morató et al. (2022)).

Therefore, we believe that it is important to analyse performance at high pruning ratio as well, particularly when we want to deploy CNNs on resource-constrained devices. In this case, the proposed pruning method can be useful compared to that of the existing norm-based pruning methods as the proposed pruning method gives similar or better performance compared to that of the unpruned network.

**Comment 4:** As the authors describe the merits of structured pruning over unstructured pruning include actual inference speedup, it would be good to measure the latency on high-end and/or edge GPUs.

**Response:** Thank you very much for your suggestion. In future, we aim to measure latency on high-end or edge GPUs.

**Comment 5:** Some pruning methods (Lin et al., 2020; Yeom et al., 2021) apply SVD to features maps to measure the amount of information, but this paper does to weights. It would be helpful to compare these feature-based and weight-based pruning criteria and discuss pros and cons.

Lin et al., HRank: Filter Pruning using High-Rank Feature Map, CVPR’20

Yeom et al., Toward Compact Deep Neural Networks via Energy-Aware Pruning, arXiv’21

**Response:** We have compared with feature map based pruning methods in Table 3 in the revised manuscript. Please refer to response to Comment 2 for detailed explanation.

**Comment 6:** I think the empirical validation is too weak and additional experiments with ResNets on large-scale vision datasets are necessary.

**Response:** We have performed experiments on VGG-16 and ResNet-50 networks for CIFAR-10 classification and the experimental analysis is included in Appendix in the revised manuscript.

**Comment 7:** typo: 6p, unrpuned networks at  $p = 25\%$  -> unprune

**Response:** In the revised manuscript, we have corrected the mistake.

### 3 REVIEWER 3: REVIEWER MKSS

We thank reviewer for their valuable suggestions and comments. We appreciate that the reviewer finds that the paper is easy to understand. We have addressed the comments asked by the reviewer as given below,

**Comment 1:** As claimed in the paper, in order to judge the influence of the filter only from the maximally stretched direction point of view and ignore all other directions, it seems the largest singular value in SVD should be much larger than other singular values. That is, in Figure 1,  $Y = FX = (\sigma_1 u_1 w_1^T)X + (\sigma_2 u_2 w_2^T)X \approx (\sigma_1 u_1 w_1^T)X$  seems to hold, but there is no explanation for this.

**Response:** In this work, we consider filters as a transformation matrix that transform input feature maps to output feature maps. The operator norm of the filter is equal to the largest singular value ( $\sigma_1$ ) of the filter, and it represents how maximally the input data gets stretched, when input data is operated by the filter. Also, approximating filter using Rank-1 approximation (which is corresponding to the  $\sigma_1$ ) gives the best least square approximation of the filter.

We analyse the ratio of  $\sigma_1$  and  $\sigma_2$  across various networks used for experimentation, and find that  $\sigma_1/\sigma_2$  varies from 1.2 to 1.5 across various networks, indicating that the direction corresponding to  $\sigma_1$  stretches the input by 1.2 to 1.5 times compared to that of the direction corresponding to  $\sigma_2$ . In this work, considering direction corresponding to  $\sigma_1$  for measuring importance of the filters, appears to be working as the direction represents the best rank-1 approximation and scale the input by 20% to 50% higher than that of the direction corresponding to  $\sigma_2$ .

**Comment 2:** This paper proposes a passive filter pruning method, but there is no explanation or comparison about the advantages compared to the active method.

**Response:** We have revised the manuscript to more clearly compare the proposed passive filter pruning method with active filter pruning method. Please see Page 2 (highlighted text) and Appendix: Table 3 in the revised manuscript.

We use HRank (Lin et al. (2020)), Energy-aware pruning (Yeom et al. (2021)), L1-slimming (Liu et al. (2017)), and GAL-0.1 (Lin et al. (2019)) active filter pruning methods to compare the performance of VGG-16 network using CIFAR-10 dataset.

In general, we find that pruning filters using the proposed pruning method result in a similar reduction of parameters with a drop in accuracy of approximately 1 percentage points compared to the methods that involve dataset to prune filters by using feature maps (Lin et al. (2020); Yeom et al. (2021)), regularisation techniques during training (Liu et al. (2017)) or knowledge distillation (Lin et al. (2019)). Therefore, the proposed pruning method is advantageous due to identifying pruned filters without using any dataset, and the pruned network can still achieves accuracy close to that of the active filter pruning methods.

**Comment 3:** In the image classification experiment, the MNIST dataset and the VGG16 model alone are insufficient to guarantee the performance of the proposed method.

**Response:** We have included more experiments on VGG-16 network and ResNet-50 network using CIFAR-10 dataset in the revised manuscript (Appendix). Also, we have updated the code repository covering the experiments for VGG-16 network and ResNet-50 network on CIFAR-10.

**Comment 4:** In Figure 6, the criteria for determining the pruned layers are not specified, and I am not sure what the meaning of comparing only some layers is pruned.

**Response** We prune various subset of convolutional layers from the unpruned network. The selection of subset of layers is pseudo-random, where subset of layers are selected in an ordered manner without skipping any convolutional layer.

**Comment 5:** This paper used SVD for passive filter pruning without dataset intervention. However, since SVD is already widely used in the pruning field, it seems insufficient in terms of novelty.

**Response** The proposed pruning method performs SVD on filters to identify maximally stretched direction corresponding to operator norm of the filter along which the filter transform the input maximally in order to measure filter importance without involving any dataset. On the other hand, existing methods such as HRank(Lin et al. (2020)) use SVD to compute rank of the features generated using a dataset and energy-aware SVD based pruning method (Yeom et al. (2021)) obtains singular value of feature maps to obtain nuclear norm for defining filter importance using SVD.

Other methods which uses SVD are low-rank decomposition or matrix factorization methods (Yu et al. (2017)), which approximate the filter or weight matrix as a low-rank product of two smaller matrices using SVD. In comparison to these methods, the proposed method is a pruning method that eliminate filters from the unpruned CNN, where the number of filters from the unpruned network are changed after pruning that leads to reduce computations and parameters. This is in contrast to the matrix factorization method where the number of filter remains same in the network and computation is reduced by decomposing the filters in low-complexity matrices. It is well studied that low-rank decomposition result in large loss in accuracy under high pruning ratios compared to that of the pruning methods (Lin et al. (2020)).

## REFERENCES

- Hao Li, Asim Kadav, Igor Durdanovic, Hanan Samet, and Hans Peter Graf. Pruning filters for efficient ConvNets. In *International Conference on Learning Representations*, 2017.
- Mingbao Lin, Rongrong Ji, Yan Wang, Yichen Zhang, Baochang Zhang, Yonghong Tian, and Ling Shao. HRank: Filter pruning using high-rank feature map. In *Proceedings of the IEEE/CVF Conference on Computer Vision and Pattern Recognition*, pp. 1529–1538, 2020.

- Shaohui Lin, Rongrong Ji, Chenqian Yan, Baochang Zhang, Liujuan Cao, Qixiang Ye, Feiyue Huang, and David Doermann. Towards optimal structured cnn pruning via generative adversarial learning. In *Proceedings of the IEEE Conference on Computer Vision and Pattern Recognition*, pp. 2790–2799, 2019.
- Zhuang Liu, Jianguo Li, Zhiqiang Shen, Gao Huang, Shoumeng Yan, and Changshui Zhang. Learning efficient convolutional networks through network slimming. In *Proceedings of the IEEE International Conference on Computer Vision*, pp. 2736–2744, 2017.
- Irene Martín-Morató, Francesco Paissan, Alberto Ancilotto, Toni Heittola, Annamaria Mesaros, Elisabetta Farella, Alessio Brutti, and Tuomas Virtanen. Low-complexity acoustic scene classification in DCASE 2022 Challenge. In *proceedings of DCASE 2022 workshop*, 2022.
- Seul-Ki Yeom, Kyung-Hwan Shim, and Jee-Hyun Hwang. Toward compact deep neural networks via energy-aware pruning. *arXiv preprint arXiv:2103.10858*, 2021.
- Xiyu Yu, Tongliang Liu, Xinchao Wang, and Dacheng Tao. On compressing deep models by low rank and sparse decomposition. In *Proceedings of the IEEE Conference on Computer Vision and Pattern Recognition*, pp. 7370–7379, 2017.
